# Supplementary material
Source: ML conference proceedings conference paper supplement (https://openreview.net/forum?id=Uu2ZHgPCsu)
Supplement: supplementary_material [file attachment]

# Appendix

## A Survey text

**Question 1.** *Vote for a maximum of 5 preferred use-cases from the pre-defined list.*

- ☐ Assistive chatbot for complex cases.
- ☐ Smart retrieval of guidelines.
- ☐ chatbot to increase health literacy in patients.
- ☐ Summarization of discharge letters into patient adapted language.
- ☐ Automatic analysis of patients feedback and complaints.
- ☐ Automatic generation of imaging reports.
- ☐ Entry notes and medical records summarization.
- ☐ Smart summarization of current literature.
- ☐ Chatbot for medical professionals education.
- ☐ Clinical trial matching.

After answering to **Question 1.**, the respondent was asked to evaluate each of the chosen use-cases according to the following criteria.

***Institutional impact.*** *How would you evaluate the institutional impact of this use-case?*

- ☐ High (affecting most services)
- ☐ Medium (affecting some services)
- ☐ Low (affecting few services)

***Impact on healthcare professionals workload.*** *How would you evaluate the potential impact of this use-case on the workload of healthcare professionals?*

- ☐ Decreased workload
- ☐ No impact

- ☐ Increased workload

***Impact on patient satisfaction and engagement.*** How would you evaluate the potential impact of this use-case on patient satisfaction and engagement?

- ☐ High (affecting most services)  
☐ Medium (affecting some services)  
☐ Low (affecting few services)  
☐ No impact

***Measurable impact.*** Is the impact of a potential solution measurable with key performance indicators such as saved costs, reduction of medical errors, improved patient experience, reduction of burnout etc.?

- ☐ Yes  
☐ No  
☐ Unclear

***Intended use.*** In your opinion, could a tool based on this use-case be used for any of the following purposes: diagnosis, prevention, monitoring, prediction, prognosis, treatment or alleviation of disease?

- ☐ Yes  
☐ No  
☐ Unclear

***Risk analysis.*** In your opinion, what is the risk that such tool could lead to patient harm or misinformation? Consider the final risk, with mitigation measures in place. Mitigation measures may include: educational tools and training proper senior surveillance and monitoring

- ☐ High (affecting most services)  
☐ Medium (affecting some services)  
☐ Low (affecting few services)  
☐ No impact

***Commercial solution already available.*** To the best of your knowledge, is a solution for the current problem already available on the market

- ☐ Yes, with good performance

- ☐ Yes, but with limitations
- ☐ No or unknown

## B Additional Results

In this section we report the preliminary rankings of the use-cases for each evaluation criterion, as for the results of the structured survey, see Fig. 1.

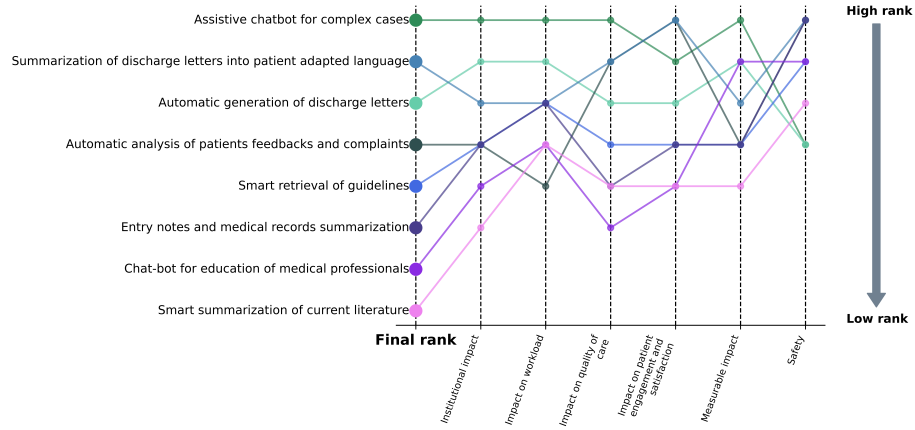

Figure 1: Ranking of the use-cases according to the preliminary results of the survey. Different use-case may have similar ranking in the same evaluation criterion.
